# Supplementary material
Source: PubMed Central journal article supplement (PMC4441853)

**A**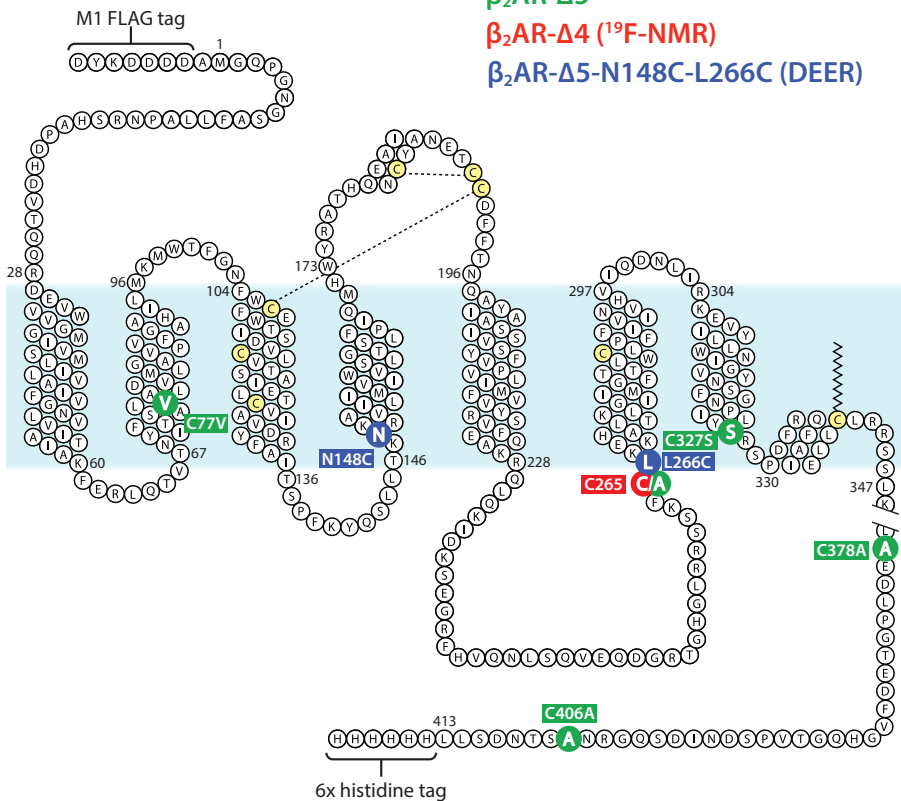**B**

**$\beta_2$ AR- $\Delta 4$  ( $^{19}\text{F}$ -NMR)**  
 **$\beta_2$ AR- $\Delta 5$**

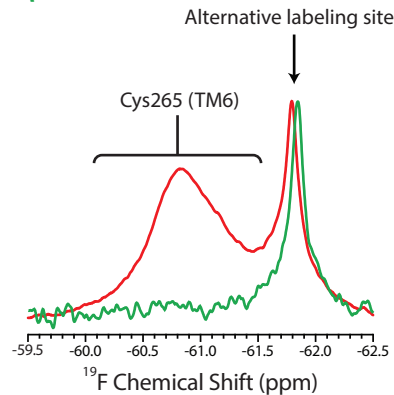**C**

**$\beta_2$ AR- $\Delta 5$  + ligands**

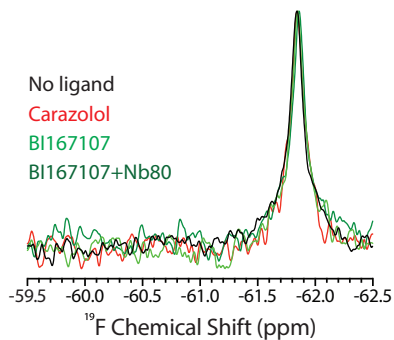**D**

**Single cysteine CW-EPR**

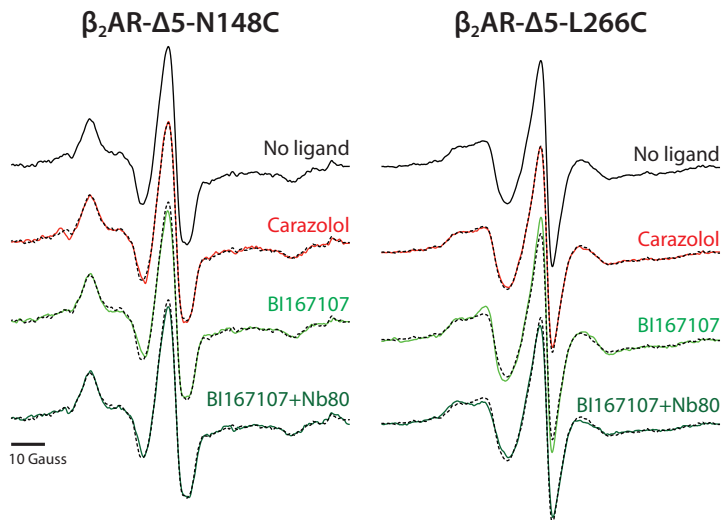**E**

**Single cysteine DEER**

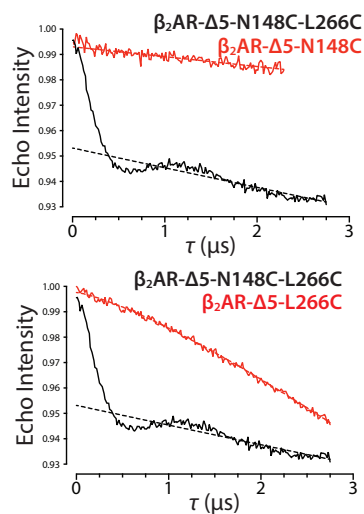

Supplement: NIHMS685994-supplement-2.pdf [file NIHMS685994-supplement-2.pdf]
