# Supplementary material
Source: PubMed Central journal article supplement (PMC4441853)

### Dipolar evolution

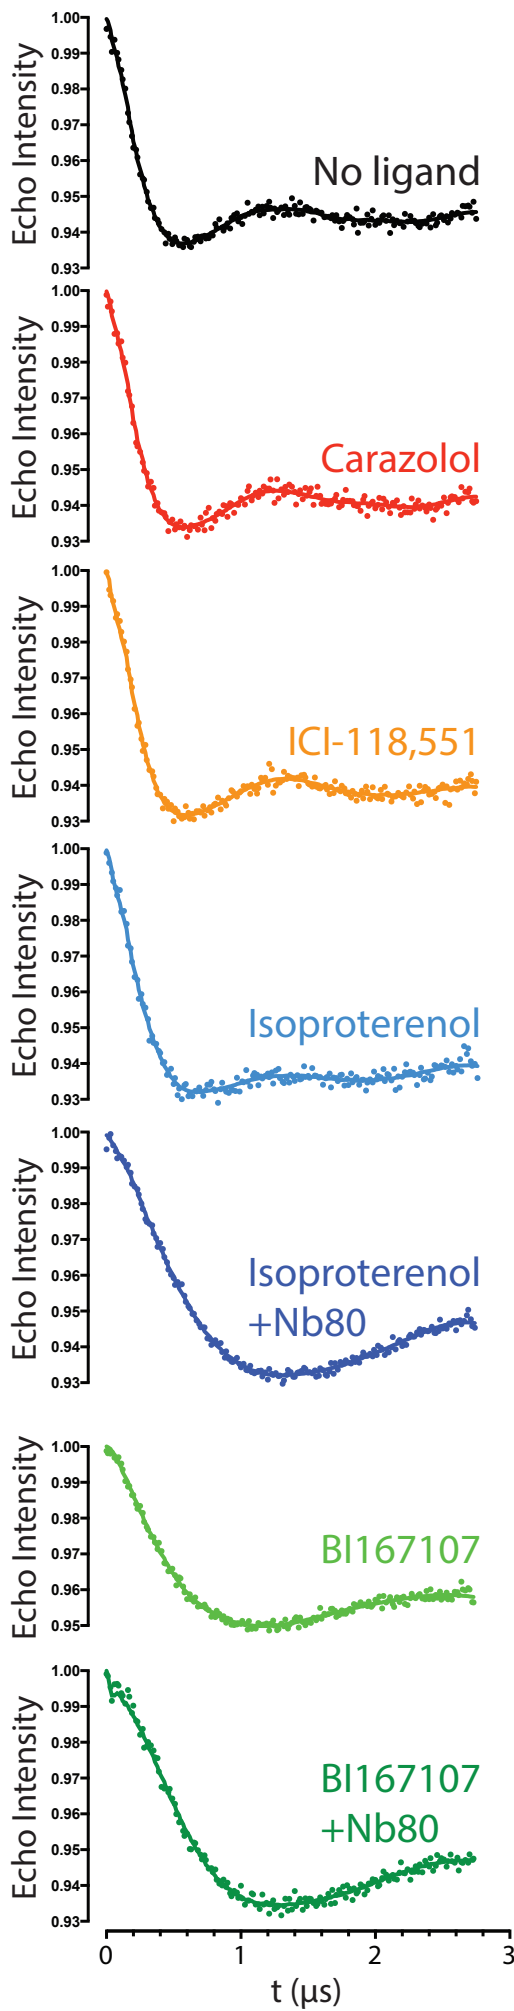

### Fitting L-curve

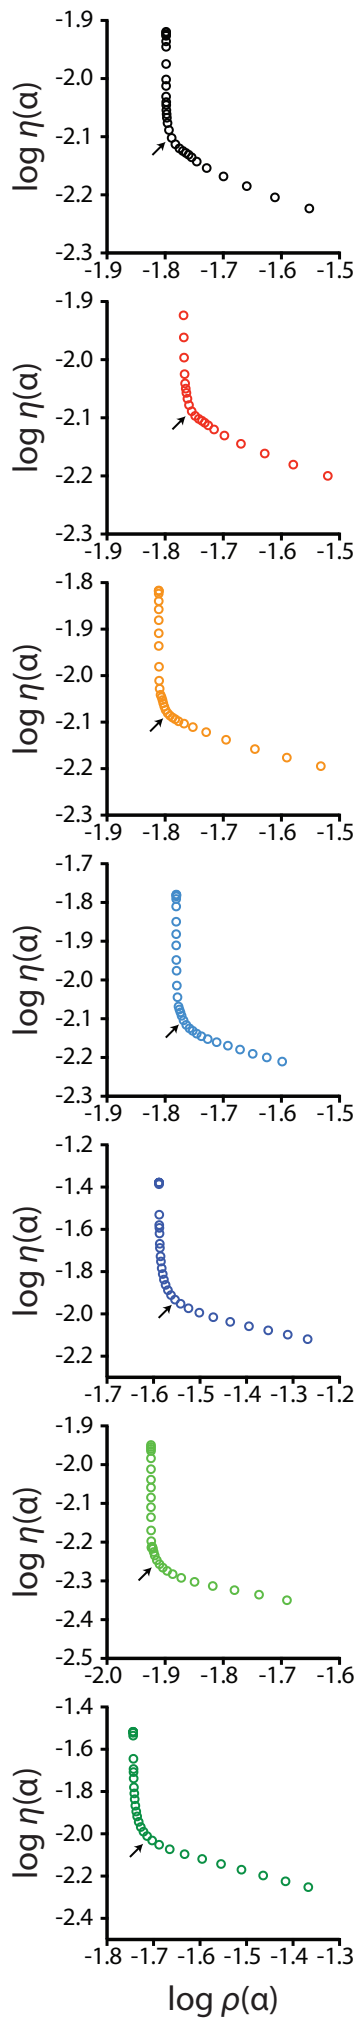

### Distance distribution

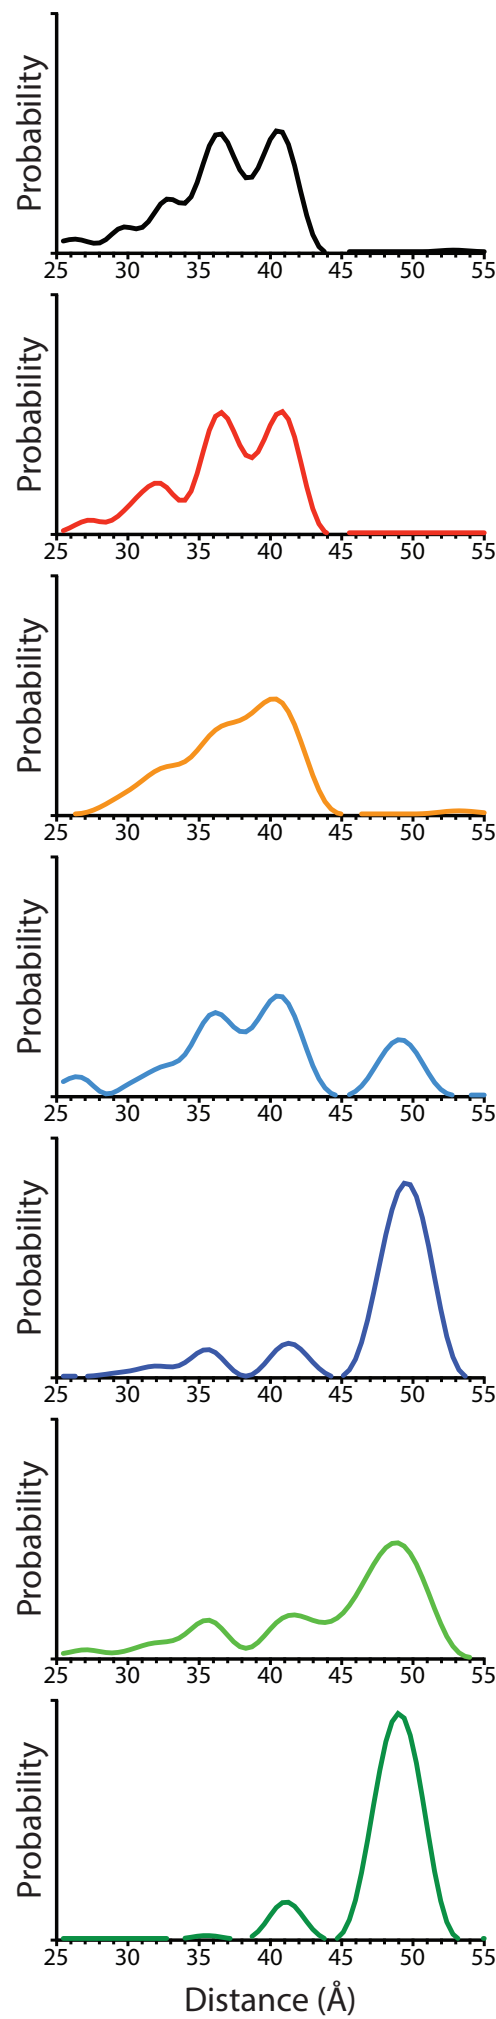

Supplement: NIHMS685994-supplement-3.pdf [file NIHMS685994-supplement-3.pdf]

A

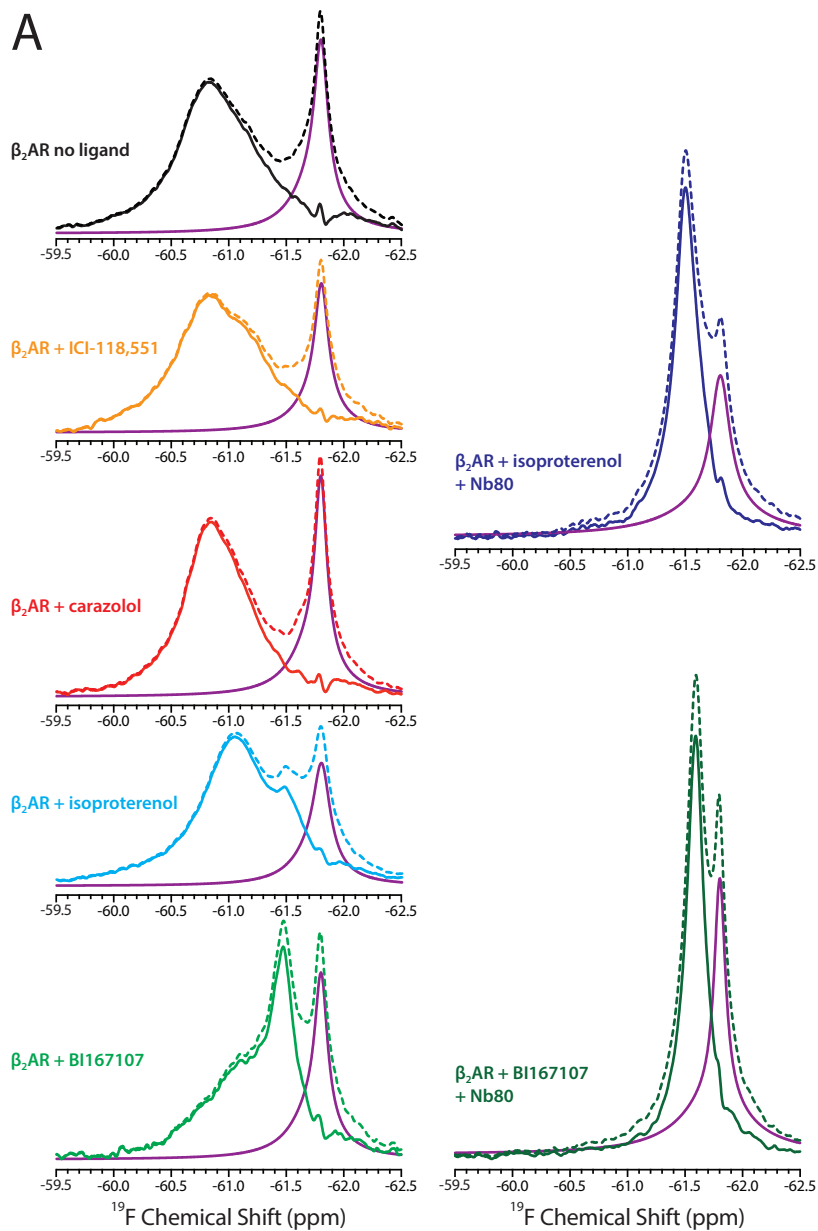

B

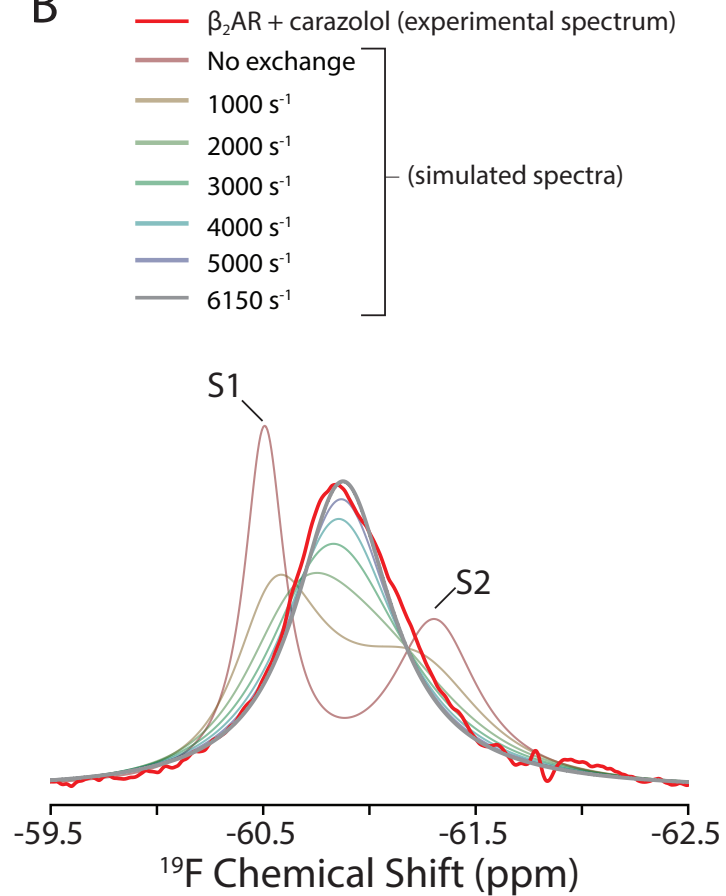

Supplement: NIHMS685994-supplement-4.pdf [file NIHMS685994-supplement-4.pdf]

A

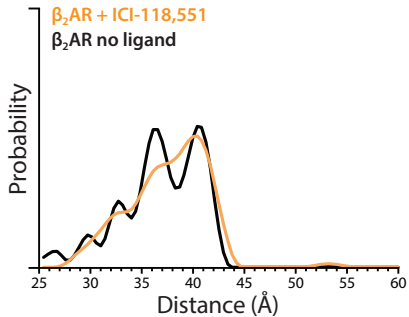

B

$\beta_2$ AR + ICI-118,551  
 $\beta_2$ AR no ligand

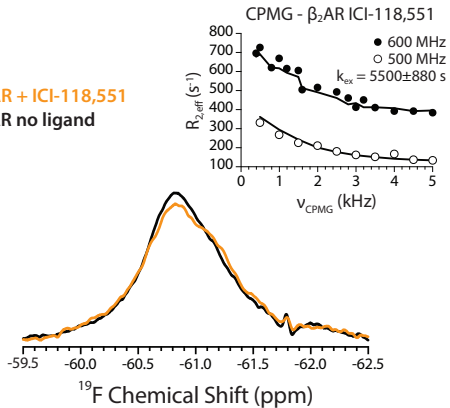

Supplement: NIHMS685994-supplement-5.pdf [file NIHMS685994-supplement-5.pdf]

**A**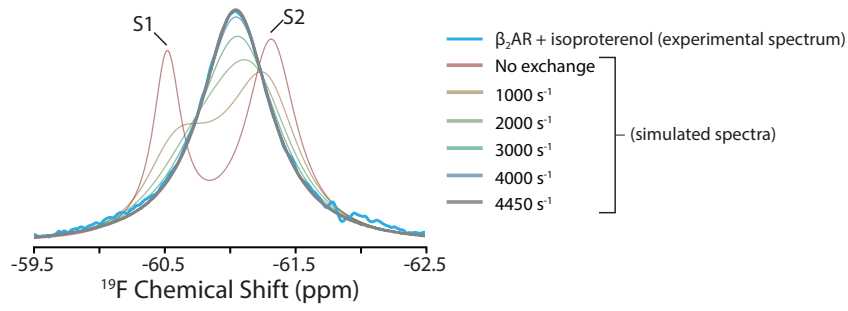**B**

Saturation of S1+S2

Control Saturation

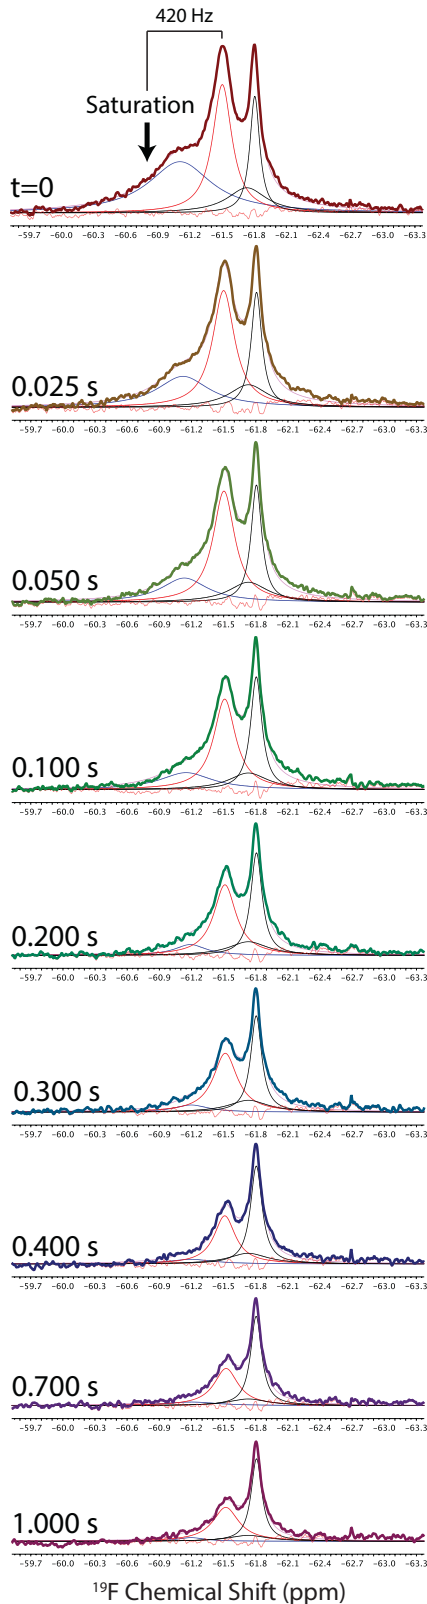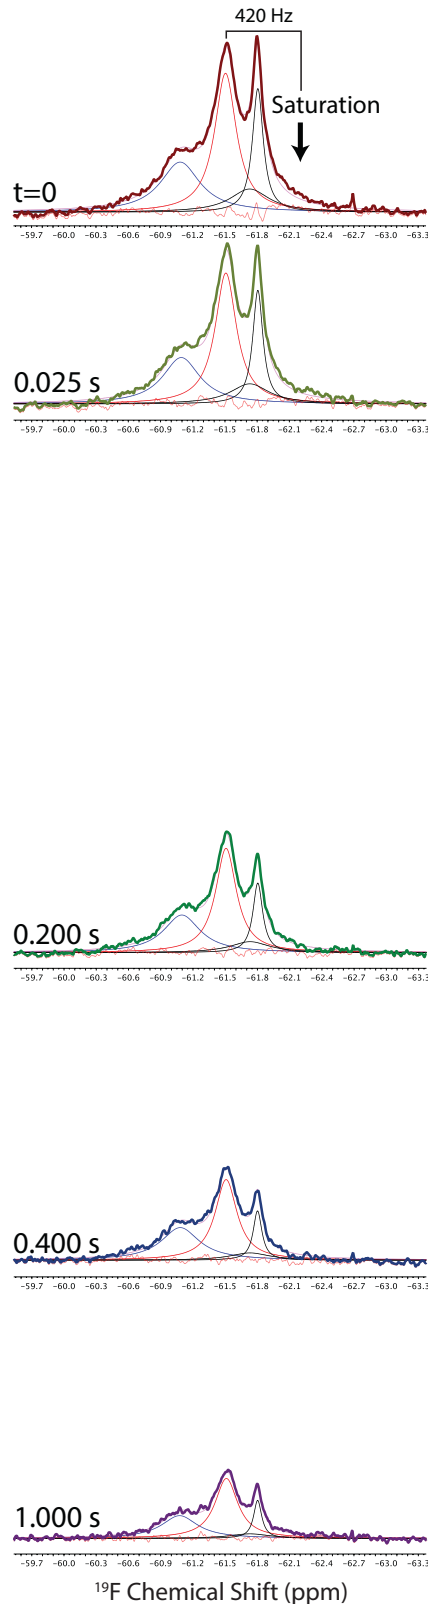

Supplement: NIHMS685994-supplement-6.pdf [file NIHMS685994-supplement-6.pdf]
